# Supplementary material for: Enhanced performance of NaTaO3 using molecular co-catalyst [Mo3S4]4+ for water splitting into H2 and O2
Source: Royal Society of Chemistry journal article supplement (doi:10.1039/c2cc36216c), 2012-01-01
Supplement: c2cc36216c.pdf [file c2cc36216c.pdf]

## Supporting Information for

### Enhanced performance of NaTaO<sub>3</sub> by molecular co-catalyst [Mo<sub>3</sub>S<sub>4</sub>]<sup>4+</sup> for water splitting into H<sub>2</sub> and O<sub>2</sub>

Se Won Seo, Sangbaek Park, Hui-Yun Jeong, Sang Hyeon Kim, Uk Sim, Ki Tae Nam,\* and Kug Sun Hong\*

Department of Materials Science and Engineering, Seoul National University, Seoul 151-744, Korea

\*To whom correspondence should be addressed.  
Email: nkitae@snu.ac.kr, kshongss@plaza.snu.ac.kr

## Experimental Section

### 1. Preparation of Catalysts

NaTaO<sub>3</sub> bulk was prepared by a conventional solid-state reaction method. Na<sub>2</sub>CO<sub>3</sub> (High-Purity Chemicals 99%) and Ta<sub>2</sub>O<sub>5</sub> (High-Purity Chemicals 99.9%) were used as raw materials. Stoichiometric mixtures of starting materials were ball-milled with ethanol and zirconia media for 24 h. The mixtures were dried in an oven (100 °C), and calcined at 1100 °C for 6 h in an Air atmosphere.

### 2. Preparation of Cocatalysts

Molybdenum sulfur, [Mo<sub>3</sub>S<sub>4</sub>(H<sub>2</sub>O)<sub>9</sub>]Cl<sub>4</sub> (hereafter [Mo<sub>3</sub>S<sub>4</sub>]<sup>4+</sup>), was synthesized by reduction of ammonium tetrathiomolybdate with sodium borohydride, as reported in the literature.[1] Solutions of [Mo<sub>3</sub>S<sub>4</sub>]<sup>4+</sup> in HCl were obtained by repeated cation-exchange chromatography (Dowex 50W-X2, 400 mesh) and checked by UV-vis spectroscopy (Hewlett-Packard 8453). For loading co-catalysts onto NaTaO<sub>3</sub>, facile and early reported impregnation method was adopted.[2] The [Mo<sub>3</sub>S<sub>4</sub>]<sup>4+</sup> co-catalysts were loaded by impregnating NaTaO<sub>3</sub> with an acidic aqueous solution of [Mo<sub>3</sub>S<sub>4</sub>]<sup>4+</sup>. To investigate the effects of co-catalysts loading method, simple mixing, photo-deposition and drop-casting method are also employed. For simple mixing method, a little solution of [Mo<sub>3</sub>S<sub>4</sub>]<sup>4+</sup> and NaTaO<sub>3</sub> powder were mixed in the acidic aqueous solution under the UV exposure for 2 h. For photo-deposition method, the

NaTaO<sub>3</sub> powder (0.1 g) was dispersed in aqueous solution containing [Mo<sub>3</sub>S<sub>4</sub>]<sup>4+</sup> clusters, followed by photoirradiation for 2 h using a UV lamp with stirring under Ar bubbling.[3] In case of drop-casting method, the solution of [Mo<sub>3</sub>S<sub>4</sub>]<sup>4+</sup> cluster was added drop-wise to the surface of NaTaO<sub>3</sub> powders. After dropping the cluster solution onto the NaTaO<sub>3</sub>, the powder was heated to 50 °C to flash off the solvent.[4] For comparison, NiO<sub>x</sub> co-catalysts were also deposited onto NaTaO<sub>3</sub> by an impregnation method from an aqueous Ni(NO<sub>3</sub>)<sub>2</sub> solution. In addition, pretreatment of reduction with H<sub>2</sub>(5%)/Ar(95%) gas mixture at 500 °C for 2 h and oxidation with O<sub>2</sub> gas at 200 °C for 1 h was carried out for NiO<sub>x</sub> loaded NaTaO<sub>3</sub> powders.

### 3. Photocatalytic reactions

The photocatalytic reactions for H<sub>2</sub> evolution were conducted at room temperature, in an outer-irradiation-type quartz reactor (200 mL) with a closed circulating gas system. A 450 W high-pressure mercury lamp was employed as the UV light source. It was laid down inside a cylindrical vessel, surrounded by a circulating cooling water jacket. The distance between the reactor and the Hg lamp was 15 cm. The photocatalyst powder (0.1 g) was dispersed in deionized water (120 mL), by magnetic stirring (10 min) and sonication (30 min). The closed gas circulation system and the reactor inside were well evacuated with high-purity Ar gas (99.999%), before irradiation. The amount of evolved H<sub>2</sub> and O<sub>2</sub> was detected via gas chromatography (Donam, DS6200).

### 4. Characterization

The crystal structures of the synthesized powders were determined using an X-ray powder diffractometer (XRD; D8-Advance, Bruker Miller Co). The morphologies and micro-structures were investigated using a field emission scanning electron microscopes (FESEM; JEOL, JSM-6330F) and a high-resolution transmission electron microscopy (HRTEM; JEOL, JEM-3000F). The elemental

analysis was studied using Energy dispersive spectrometer (EDS; JEOL, JSM-6360). The UV-Vis absorbance spectra were obtained using a UV-VIS spectrophotometer (UV-Vis spectroscopy; U-3501m, Hitachi). X-ray photoelectron spectroscopy (XPS) spectra were collected using an ESCA spectrometer (Al KR X-ray source, Sigma Probe).

## References

- [1] T. F. Jaramillo, J. Bonde, J. Zhang, B. L. Ooi, K. Andersson, J. Ulstrup and I. Chorkendorff, *J. Phys. Chem. C*, 2008, **112**, 17492-17498.
- [2] H. Kato and A. Kudo, *J. Phys. Chem. B*, 2001, **105**, 4285-4292.
- [3] Shimura, H. Kawai, T. Yoshida and H. Yoshida, *Chem. Commun.*, 2011, **47**, 8958-8960.
- [4] Y. Hou, B. L. Abrams, P. C. K. Vesborg, M. E. Björketun, K. Herbst, L. Bech, A. M. Setti, C. D. Damsgaard, T. Pedersen, O. Hansen, J. Rossmeisl, S. Dahl, J. K. Nørskov and I. Chorkendorff, *Nat. Mater.*, 2011, **10**, 434-438.

## Additional Figures

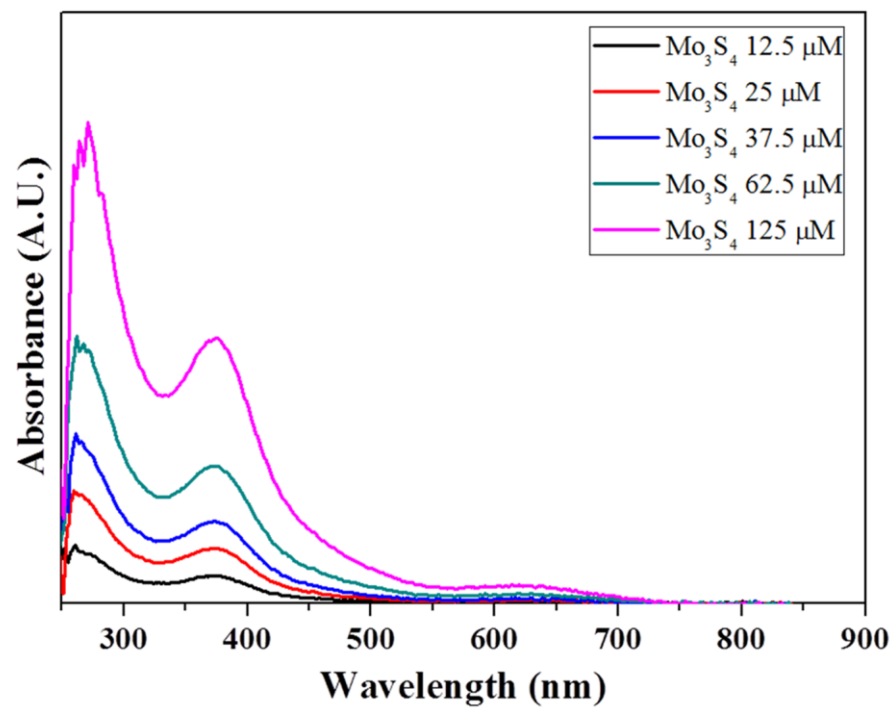

**Fig. S1.** Absorbance spectra of  $[\text{Mo}_3\text{S}_4]^{4+}$  in HCl solution.

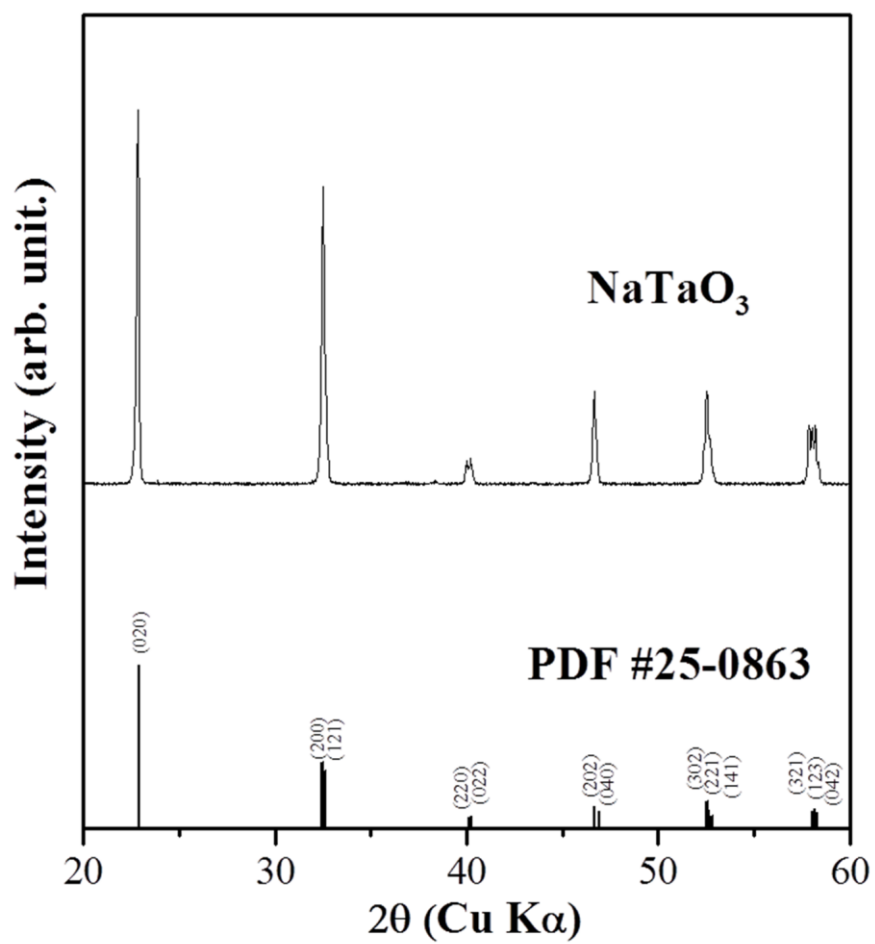

**Fig. S2.** XRD graph of bulk NaTaO<sub>3</sub>.

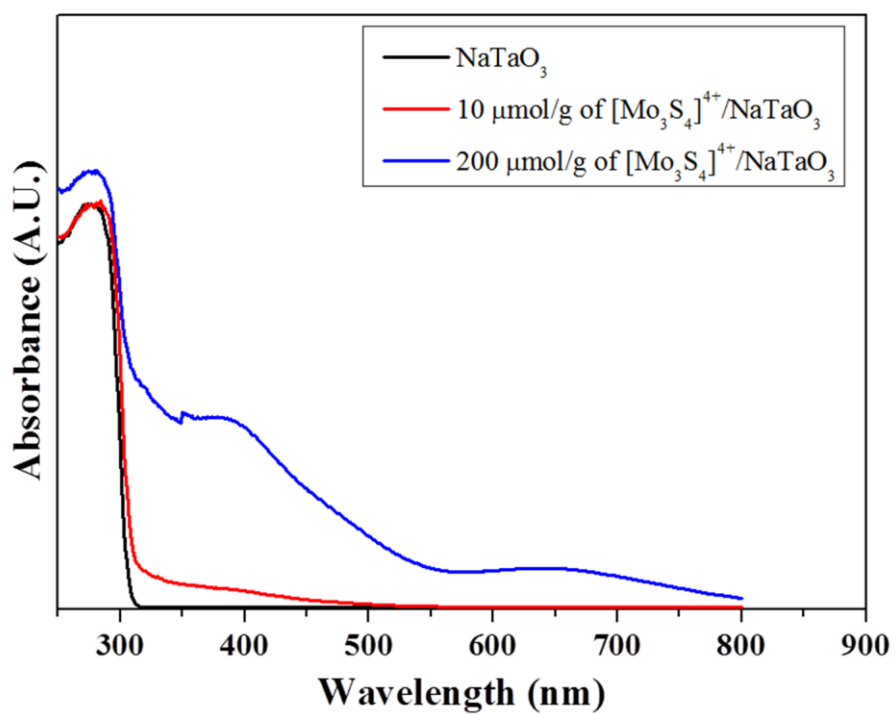

**Fig. S3.** UV-vis spectra of NaTaO<sub>3</sub> bulk (a) without and (b) with [Mo<sub>3</sub>S<sub>4</sub>]<sup>4+</sup> clusters.

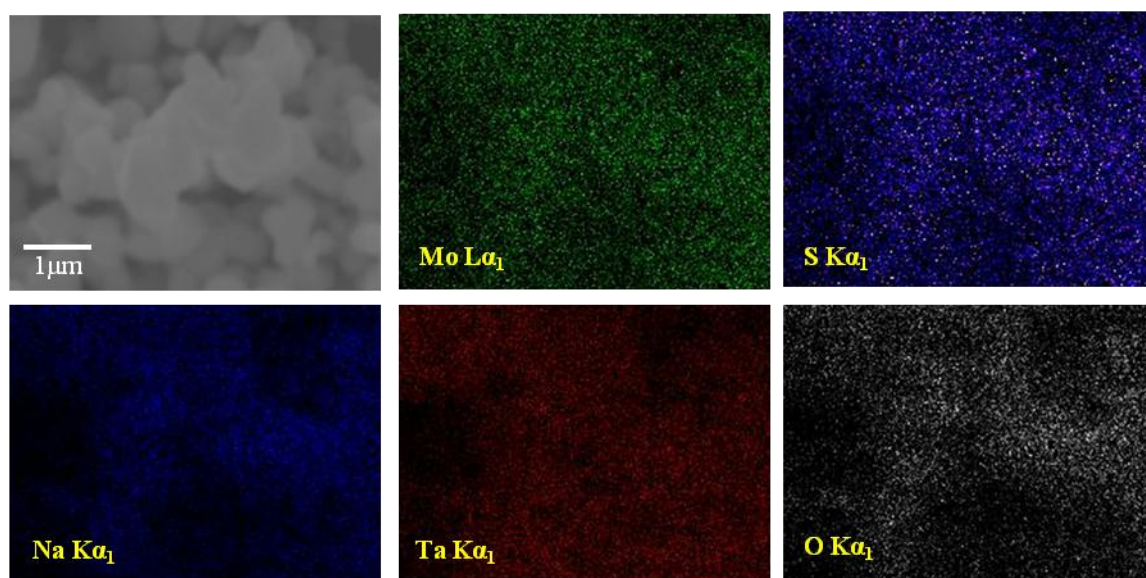

**Fig. S4.** EDS mapping of  $[\text{Mo}_3\text{S}_4]^{4+}$  molecular clusters loaded on  $\text{NaTaO}_3$ .

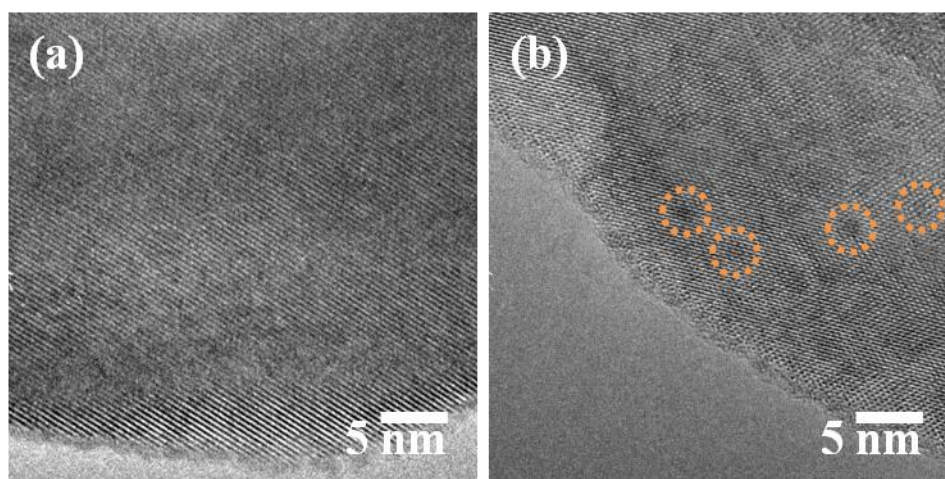

**Fig. S5.** HRTEM image of (a) bare NaTaO<sub>3</sub> powder and (b) [Mo<sub>3</sub>S<sub>4</sub>]<sup>4+</sup> loaded NaTaO<sub>3</sub> powder.



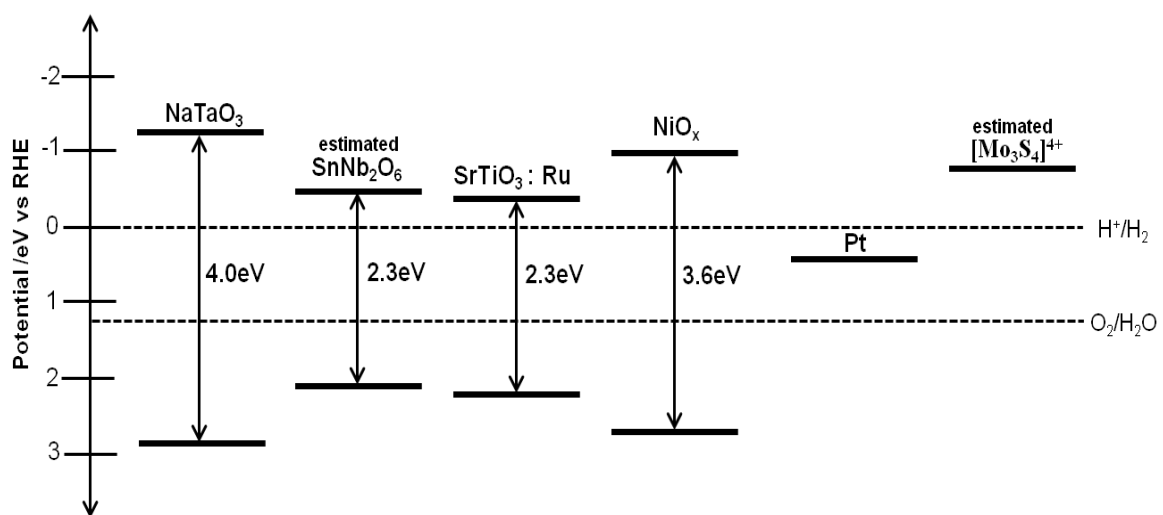

**Fig. S6.** Energy diagrams of various photocatalysts and cocatalysts.
